# Supplementary material for: Brome mosaic virus detected in Kansas wheat co-infected with other common wheat viruses
Source: Frontiers journal article supplement (doi:10.3389/fpls.2023.1096249), 2023-03-03
Supplement: Image_2.PDF [file Image_2.PDF]

Figure 1 displays the amino acid sequence alignment of the VP1 protein from various BMV strains. The alignment is presented in four panels, each showing a segment of the protein sequence (residues 1-50, 60-100, 110-150, and 160-200) for 20SM3, 19RP1, and several BMV strains (BMV-OH2, BMV-OH, BMV\_M1, BMV\_M2, BMV-OK, BMV-Germany, BMV-UK, BMV-Estonia, and BMV-CZ). The sequences are color-coded to highlight differences between the strains. The 20SM3 sequence is shown in black, while the other strains are color-coded: 19RP1 (red), BMV-OH2 (blue), BMV-OH (green), BMV\_M1 (cyan), BMV\_M2 (magenta), BMV-OK (yellow), BMV-Germany (orange), BMV-UK (brown), BMV-Estonia (pink), and BMV-CZ (grey).

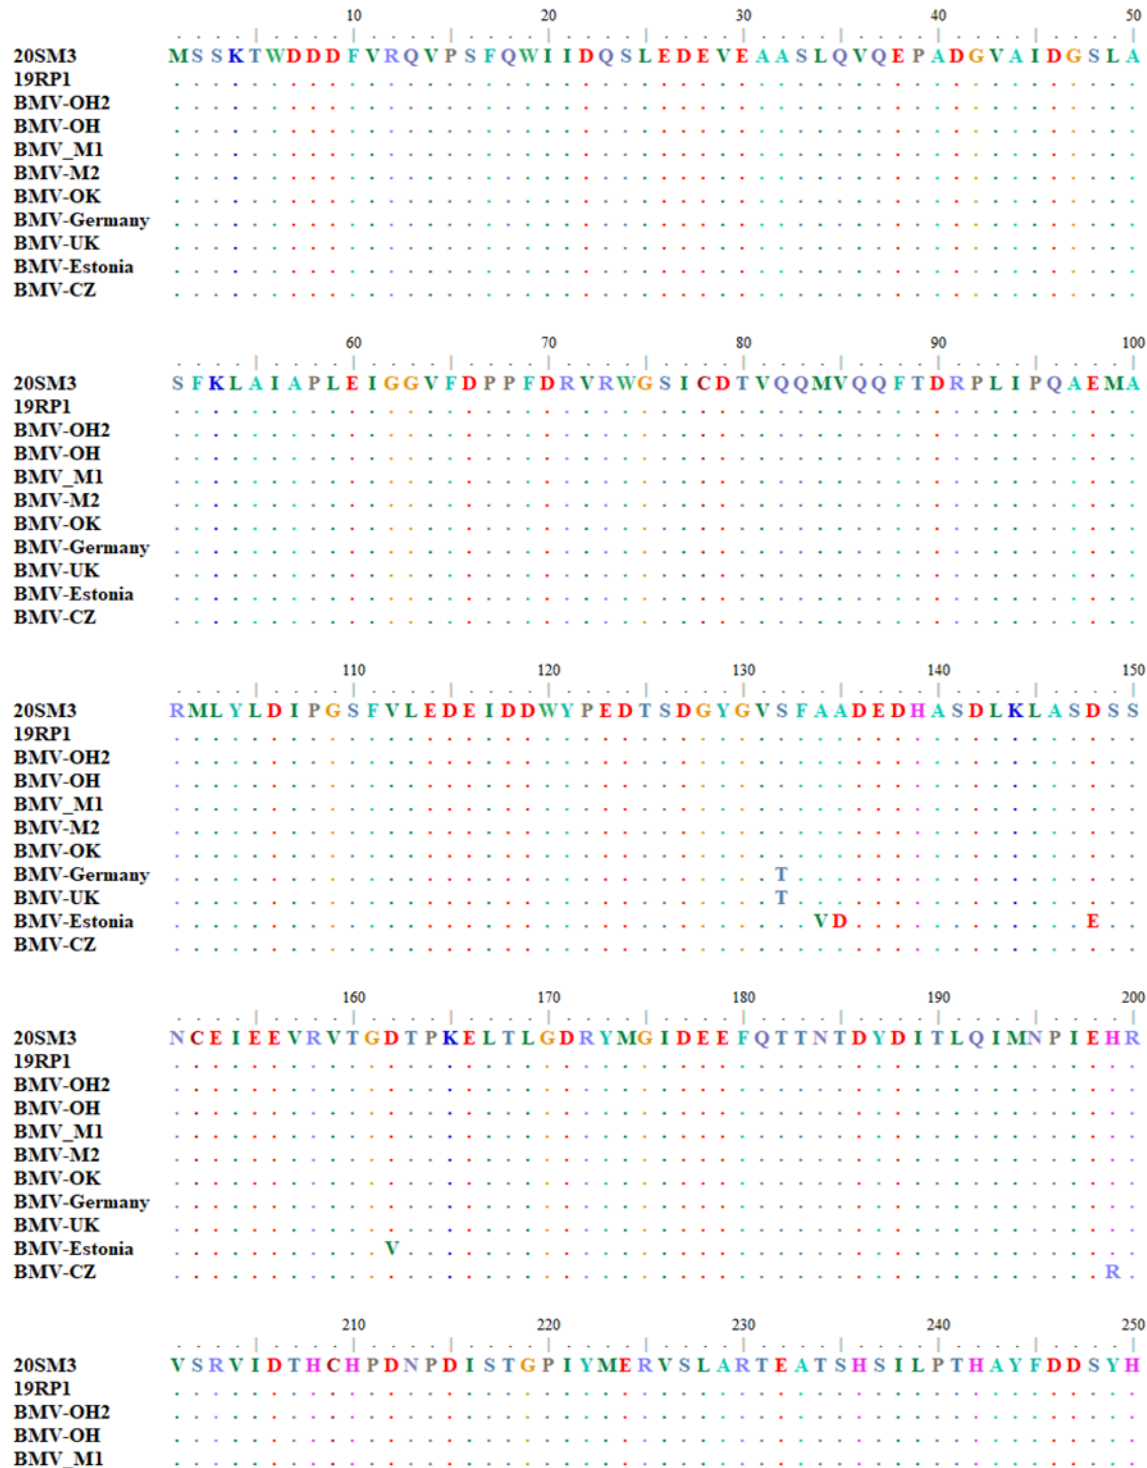

BMV-M2  
BMV-OK  
BMV-Germany  
BMV-UK  
BMV-Estonia  
BMV-CZ

260 270 280 290 300

20SM3  
19RP1  
BMV-OH2  
BMV-OH  
BMV\_M1  
BMV-M2  
BMV-OK  
BMV-Germany  
BMV-UK  
BMV-Estonia  
BMV-CZ

310 320 330 340 350

20SM3  
19RP1  
BMV-OH2  
BMV-OH  
BMV\_M1  
BMV-M2  
BMV-OK  
BMV-Germany  
BMV-UK  
BMV-Estonia  
BMV-CZ

360 370 380 390 400

20SM3  
19RP1  
BMV-OH2  
BMV-OH  
BMV\_M1  
BMV-M2  
BMV-OK  
BMV-Germany  
BMV-UK  
BMV-Estonia  
BMV-CZ

410 420 430 440 450

20SM3  
19RP1  
BMV-OH2  
BMV-OH  
BMV\_M1  
BMV-M2  
BMV-OK  
BMV-Germany  
BMV-UK  
BMV-Estonia  
BMV-CZ
